# Supplementary material for: pH-controlled fluorescence changes in a novel semiconducting polymer dot/pyrogallic acid system and a multifunctional sensing strategy for urea, urease, and pesticides
Source: Royal Society of Chemistry journal article supplement (doi:10.1039/c7ay02284k), 2017-01-01
Supplement: c7ay02284k1.pdf [file c7ay02284k1.pdf]

## Supporting Information

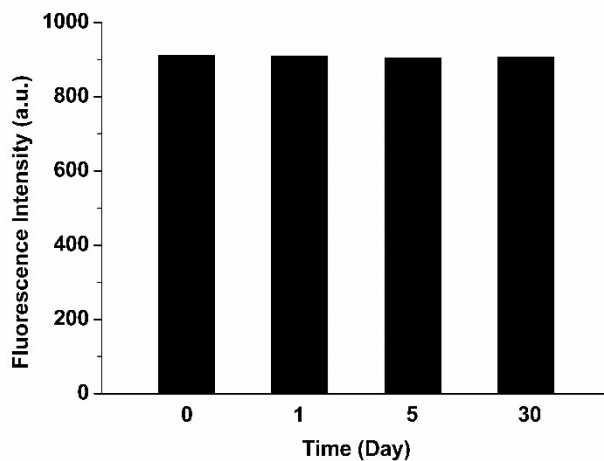

Fig. S1 The fluorescence intensity of Pdots at 668 nm after maintained at 4 °C for different time.

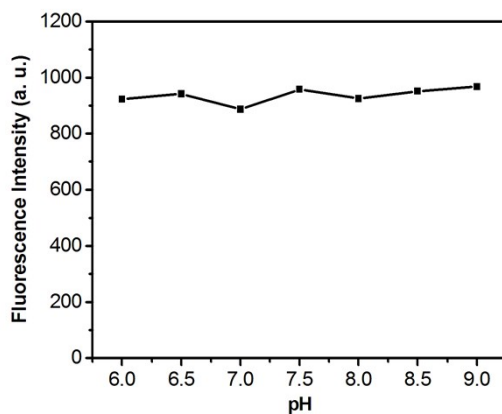

Fig. S2 The effect of pH value (6.0, 6.5, 7.0, 7.5, 8.0, 8.5 and 9.0) on the fluorescence intensity of Pdots.

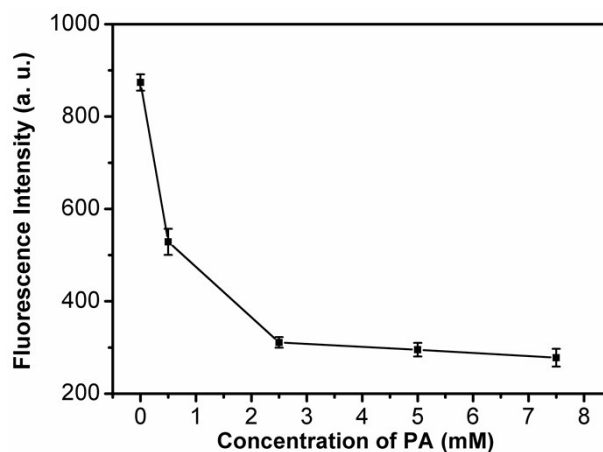

Fig. S3 The influence of different concentrations of PA (0, 0.5, 2.5, 5 and 7.5 mM) on the fluorescence intensity of Pdots solutions at pH 9.0.

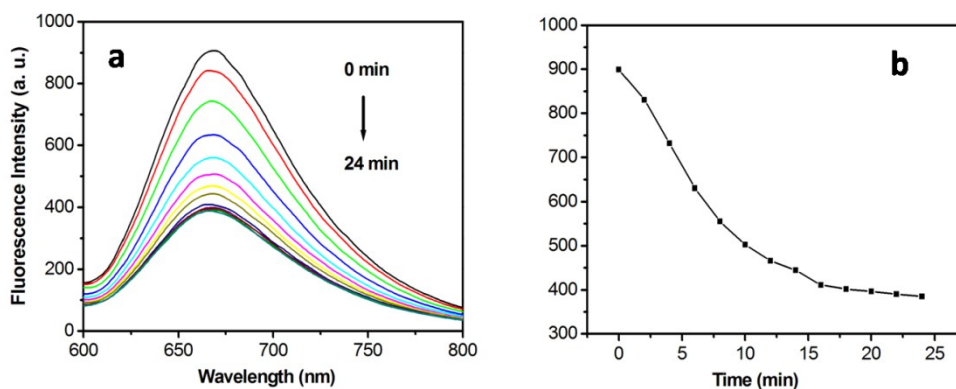

Fig. S4 (a) The effect of reaction time (2, 4, 6, 8, 10, 12, 14, 16, 18, 20, 22 and 24 min) on the fluorescence spectra of Pdots/PA after the adding of  $\text{OH}^-$ ; (b) The relationship between fluorescence intensity at 668 nm and the reaction time.

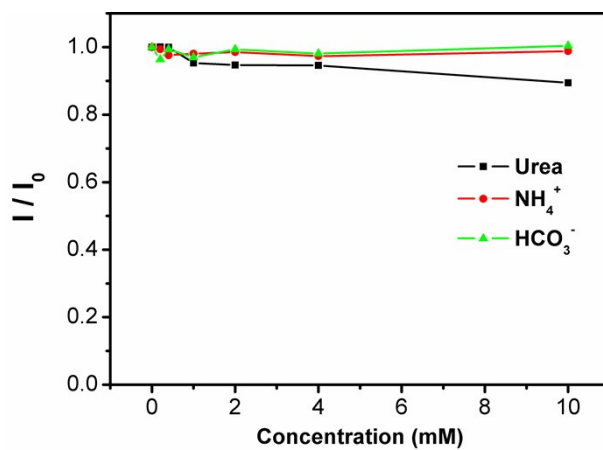

Fig. S5 The effect of urea,  $\text{NH}_4^+$  and  $\text{HCO}_3^-$  concentration on the fluorescence intensity of Pdots.
